# Supplementary material for: Microbiological water quality in a decentralized Arctic drinking water system
Source: Royal Society of Chemistry journal article supplement (doi:10.1039/d0ew00019a), 2020-01-01
Supplement: d0ew00019a1.pdf [file d0ew00019a1.pdf]

1 **Supplemental information**

2

3 **Microbiological water quality in a decentralized Arctic drinking water system**

4 Stephanie L. Gora<sup>1</sup>, Tim Anaviapik Soucie<sup>2</sup>, Nicole E. Allward<sup>1</sup>, C. Carolina Ontiveros<sup>1</sup>, Vincent

5 L'Hérault<sup>3</sup>, Megan Kunuk Gavin<sup>4</sup>, Benjamin F. Trueman<sup>1</sup>, Jessica Campbell<sup>1,5</sup>, Amina K.

6 Stoddart<sup>1</sup>, Graham A. Gagnon<sup>1</sup>

7 <sup>1</sup>Department of Civil and Resource Engineering, Dalhousie University, Halifax, NS, Canada,

8 B3H 4R2

9 <sup>2</sup>Community of Pond Inlet, Pond Inlet, NU, Canada, X0A 0S0

10 <sup>3</sup>ARCTICConnexion, Québec, QC, Canada, G1L 1Y8

11 <sup>4</sup>Nunavut Arctic College, Iqaluit, NU, Canada, X0A 0H0

12 <sup>5</sup>Halifax Water, 450 Cowie Hill Rd., Halifax, NS, Canada, B3P 2V3

### 13 General water quality

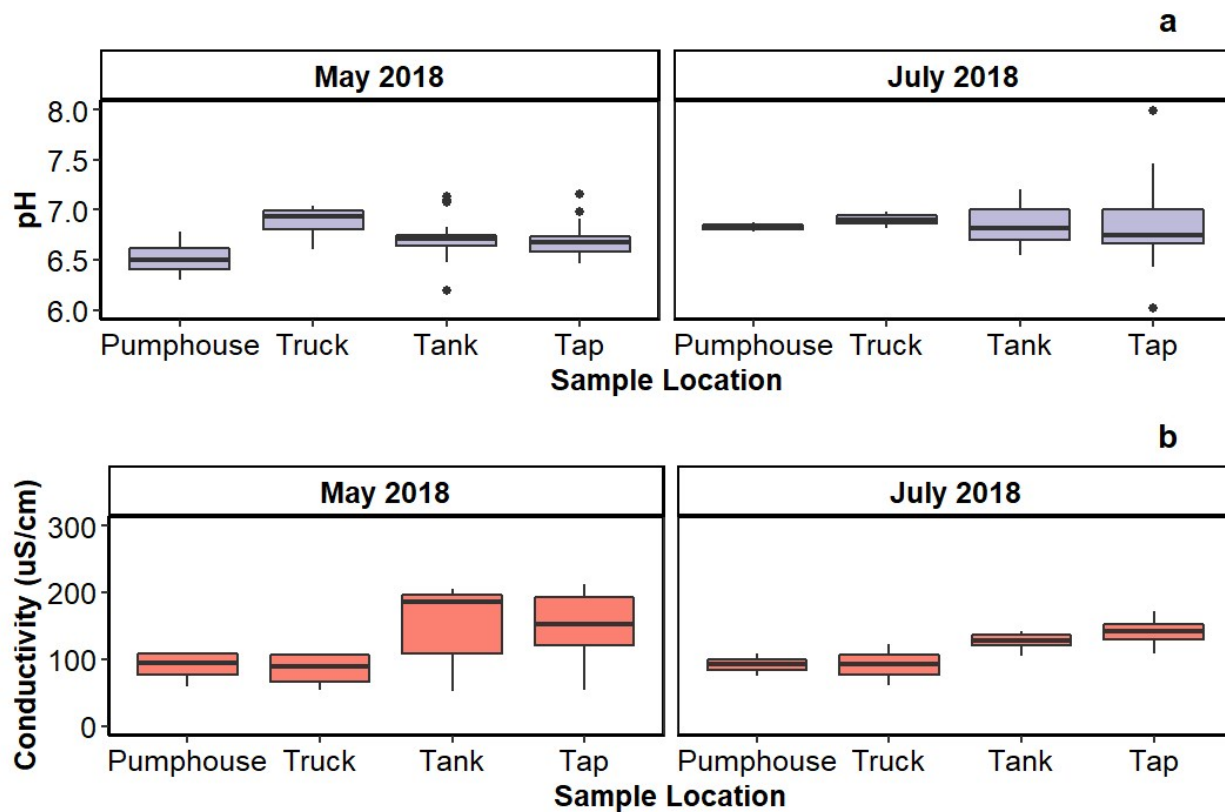

**Figure S1** pH (a) and conductivity (b) measured in water gathered from the pumphouse, truck and storage tanks and taps in six buildings in Pond Inlet, NU, in July 2018

19

20 **Table S1** Summary of chemical / physical water quality at different locations in the Pond Inlet drinking water system in May 2018 (median,  
21 min – max [n])

| Parameter      | Units | Source                 | Truck                  | Tanks                  | Taps <sup>1</sup>      |
|----------------|-------|------------------------|------------------------|------------------------|------------------------|
| Turbidity      | NTU   | 2.94, 2.45 – 3.59 [4]  | 2.66, 2.54 – 2.83 [4]  | 2.78, 0.66 – 3.20 [22] | 3.02, 1.04 – 5.12 [38] |
| Colour         | CU    | 36, 35 – 37 [3]        | 31, 31 – 33 [3]        | 36, 32 – 39 [10]       | 40, 23 – 93 [36]       |
| pH             |       | 6.51, 6.30 – 6.78 [4]  | 6.93, 6.60 – 7.04 [4]  | 6.70, 6.20 – 7.13 [22] | 6.67, 6.47 – 7.16 [34] |
| Conductivity   | uS/cm | 94.7, 59.2 – 109.3 [4] | 71.4, 53.7 – 108.7 [4] | 186, 52.6 – 205.6 [22] | 153, 53.0 – 211.8 [34] |
| Free Chlorine  | mg/L  | 0.03, 0.02 – 0.03 [2]  | 0.12, 0.08 – 0.15 [4]  | 0.06, 0.03 – 0.09 [8]  | 0.08, 0.00 – 0.15 [29] |
| Total Chlorine | mg/L  | 0.02, 0 – 0.04 [4]     | 0.48, 0.40 – 0.53 [4]  | 0.16, 0.12 – 0.23 [8]  | 0.06, 0.00 – 0.22 [36] |

22 <sup>1</sup>Tap water results represent “first flush” samples obtained randomly over the course of the day (random daytime samples)

23

24 **Table S2** Summary of chemical / physical water quality at different locations in the Pond Inlet drinking water system in July 2018 (median,  
25 min – max [n])

| Parameter      | Units | Source                 | Truck                 | Tanks                  | Taps <sup>1</sup>      |
|----------------|-------|------------------------|-----------------------|------------------------|------------------------|
| Turbidity      | NTU   | 1.14, 1.08 – 1.21 [2]  | 1.54, 1.47 – 1.60 [2] | 1.00, 0.80 – 1.55 [10] | 1.26, 0.92 – 1.57 [8]  |
| Colour         | CU    | 23 [1]                 | 20, 19 – 21 [2]       | 21, 10 – 23 [12]       | 20, 11 – 32 [12]       |
| pH             |       | 6.83, 6.78 – 6.88 [2]  | 6.90, 6.82 – 6.98 [2] | 6.82, 6.55 – 7.20 [10] | 6.74, 6.02 – 7.99 [10] |
| Conductivity   | uS/cm | 91.9, 75.4 – 108.0 [2] | 91.7, 61.2 – 122 [2]  | 128, 105 – 142 [10]    | 142, 108 – 172 [10]    |
| Free Chlorine  | mg/L  | 0.04 [1]               | 0.03 [1]              | 0.03, 0.02 – 0.21 [10] | 0.03, 0.01 – 0.19 [10] |
| Total Chlorine | mg/L  | 0.05, 0.04 – 0.05 [2]  | 0.09, 0.03 – 0.14 [2] | 0.05, 0.01 – 0.20 [10] | 0.04, 0.01 – 0.20 [10] |

26 <sup>1</sup>Tap water results represent “first flush” samples obtained randomly over the course of the day (random daytime samples)

## 27 **Total coliforms**

28 Duplicate samples collected from the pumphouse on May 18, 2018 had readings of 1 and 3.1  
29 MPN/100mL. Positive readings were also obtained in duplicate pumphouse samples gathered on  
30 June 19, 2018 (1 and 12.4 MPN/100 mL), in a single sample gathered from the pumphouse on  
31 June 25 (12.4 MPN), and in a single sample from the pumphouse on November 7, 2018 (1  
32 MPN/100mL). A first draw (RDT) sample gathered from the tap in Building 7 had a reading of 1  
33 MPN/100 mL on October 24, 2018.

34 The majority of the Colilert™ results were below the detection limit ( $\text{MPN} < 1$ ) resulting in a  
35 highly censored dataset ( $> 50\%$  censored). The non-parametric Kruskal-Wallis test is  
36 recommended for comparing multiple groups censored datasets with a single detection limit (1)  
37 and was used in this study to determine if significant differences existed between the Colilert™  
38 results from different sample locations or different sample months. The location where a sample  
39 was gathered was a significant factor ( $p < 0.05$ ) but the month in which the sample was taken  
40 was not ( $p > 0.05$ ). When the analysis was restricted to tap water samples, there were no  
41 significant differences based on location, indicating that the significant difference detected in the  
42 full dataset was related to the multiple pumphouse samples that had  $> 1$  MPN.

43

## 44 **Results of DNA analysis**

### 45 **16S (bacterial DNA) taxonomic profiles**

#### 46 *Phylum level*

47 Taxonomic profiles at the phylum level are presented in Figure S2 and summarized in Table S3.

48 The pumphouse and truck samples were the only ones that contained more than 2.5%

49 Verrucomicrobia. Cyanobacteria was present in the water sample from Building 3 (2.7%) and the  
50 biofilm from Building 5 as well as in the pumphouse and truck water samples at 1.8% and 1.1%,

51 respectively. Acidobacteria was present in the water sample from Building 6 at 8.6% and in the  
52 water samples from the pumphouse and truck at much lower abundances (0.07% and 0.06%,  
53 respectively). Nitrospirae was present in the biofilm from the tank in Building 1 (13.7%) and the  
54 water sample from Building 6 (3.1%) but was not found in the water samples from the  
55 pumphouse or the truck.

#### 56 *Family level*

57 Figure S3 and Table S4 summarize the family level taxonomic profiles of the water and biofilm  
58 samples analyzed in this study. All of the water samples and most of the biofilm samples  
59 contained ASVs from the family *Sphingomonadaceae*, though the abundance varied from 7.1% in  
60 the biofilm sample from Building 5 to 65% in the tap water sample from Building 1. Bacteria  
61 from this family are ubiquitous in the environment, including in tap water and health-care  
62 settings, and have been associated with opportunistic infections (Vaz-Moreira *et al.*, 2011). All  
63 of the water samples also contained ASVs associated with the family *Burkholderiaceae* and the  
64 majority contained ASVs from the family *Pirellulaceae*.

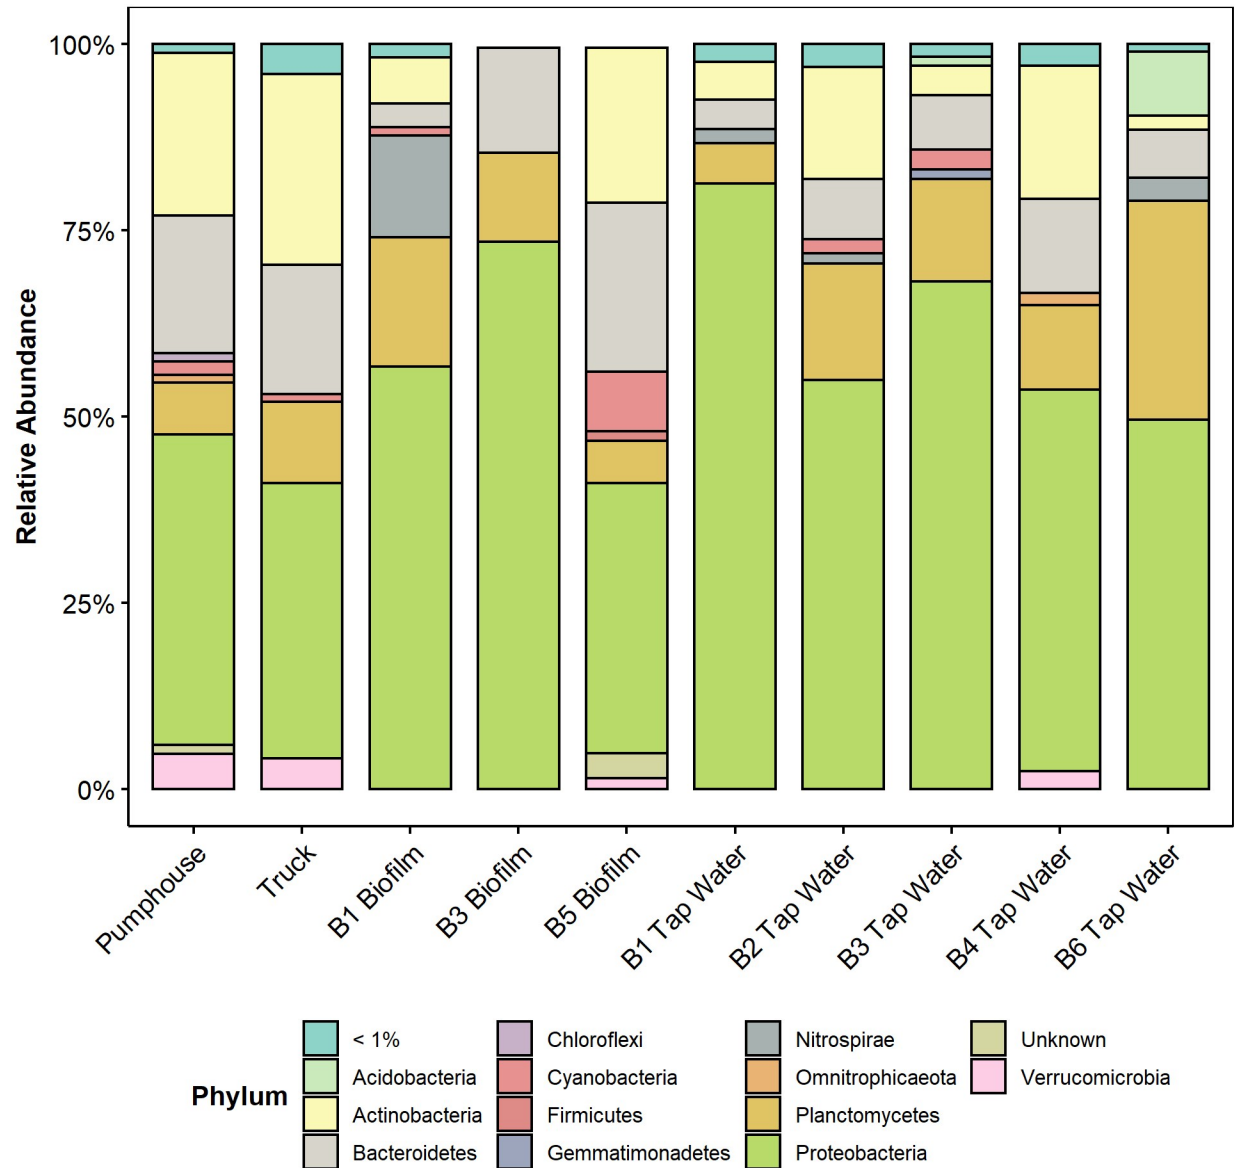

**Figure S2** Distribution of bacterial phyla (abundance > 1%) measured in water and biofilm samples gathered from the Pond Inlet drinking water system in May 2018.

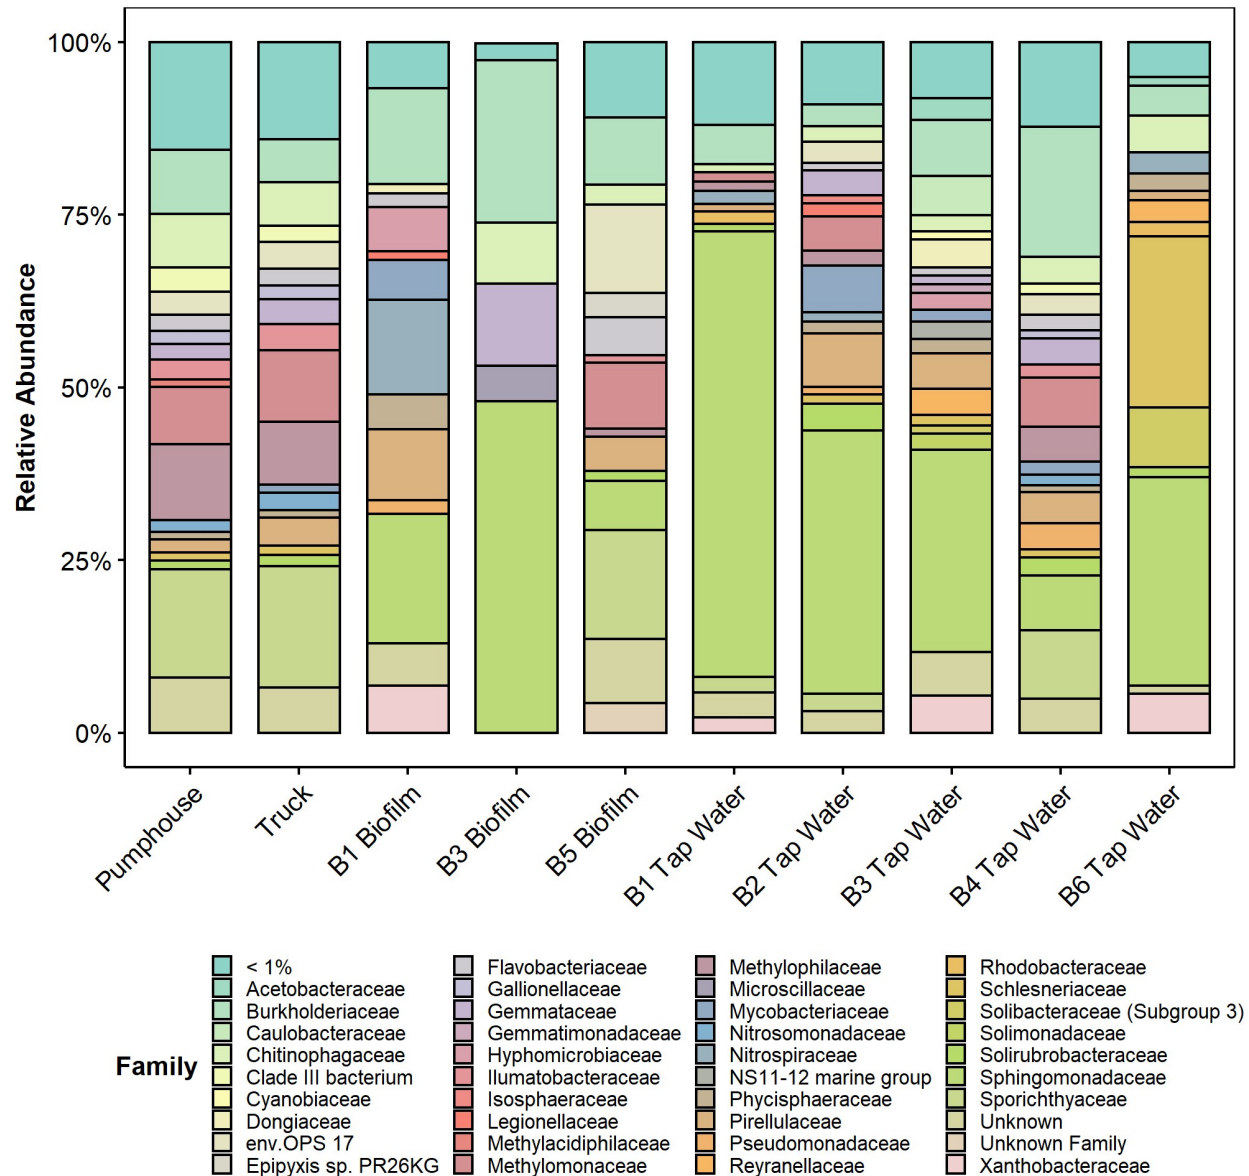

**Figure S3** Distribution of bacterial families (abundance > 1%) measured in water and biofilm samples gathered from the Pond Inlet drinking water system in May 2018

73 **Table S3** Percent distribution of bacterial phyla measured in water and biofilm samples gathered from the Pond Inlet drinking water system  
74 in May 2018

| <b>Phylum</b>                    | <b>PH</b>    | <b>TR</b>    | <b>B1_B</b>  | <b>B2_B</b> | <b>B3_B</b>  | <b>B5_B</b>  | <b>B1_W</b>  | <b>B2_W</b>  | <b>B3_W</b>  | <b>B4_W</b>  | <b>B6_W</b>  |
|----------------------------------|--------------|--------------|--------------|-------------|--------------|--------------|--------------|--------------|--------------|--------------|--------------|
| Acidobacteria                    | --           | --           | --           | --          | --           | --           | --           | --           | --           | --           | 8.6%         |
| Actinobacteria                   | 21.8%        | 25.6%        | 6.2%         | 6.5%        | --           | 20.8%        | 5.1%         | 15.1%        | 3.9%         | 17.9%        | --           |
| Bacteroidetes                    | 18.5%        | 17.3%        | 3.2%         | --          | 14.1%        | 22.7%        | 4.0%         | 8.1%         | 7.3%         | 12.6%        | 6.4%         |
| Cyanobacteria                    | --           | --           | --           | --          | --           | 8.0%         | --           | --           | 2.7%         | --           | --           |
| Nitrospirae                      | --           | --           | 13.7%        | --          | --           | --           | --           | --           | --           | --           | 3.1%         |
| Planctomycetes                   | 6.9%         | 10.9%        | 17.3%        | --          | 11.9%        | 5.6%         | 5.4%         | 15.7%        | 13.7%        | 11.4%        | 29.4%        |
| Proteobacteria                   | 41.6%        | 36.9%        | 56.7%        | 93.5%       | 73.5%        | 36.2%        | 81.3%        | 54.9%        | 68.2%        | 51.2%        | 49.5%        |
| Verrucomicrobia                  | 4.7%         | 4.1%         | --           | --          | --           | --           | --           | --           | --           | --           | --           |
| <b>Total &gt; 2.5%</b>           | <b>93.5%</b> | <b>84.8%</b> | <b>97.1%</b> | <b>100%</b> | <b>99.5%</b> | <b>93.3%</b> | <b>95.8%</b> | <b>93.8%</b> | <b>95.8%</b> | <b>93.1%</b> | <b>97.0%</b> |
| <b>&lt; 2.5%</b>                 | <b>6.5%</b>  | <b>15.2%</b> | <b>2.9%</b>  | <b>0%</b>   | <b>0.5%</b>  | <b>6.7%</b>  | <b>4.2%</b>  | <b>6.2%</b>  | <b>4.2%</b>  | <b>6.9%</b>  | <b>3.0%</b>  |
| <b>Total</b>                     | <b>100%</b>  | <b>100%</b>  | <b>100%</b>  | <b>100%</b> | <b>100%</b>  | <b>100%</b>  | <b>100%</b>  | <b>100%</b>  | <b>100%</b>  | <b>100%</b>  | <b>100%</b>  |
| <b>Number of Phyla &gt; 2.5%</b> | <b>5</b>     | <b>5</b>     | <b>5</b>     | <b>2</b>    | <b>3</b>     | <b>5</b>     | <b>4</b>     | <b>4</b>     | <b>5</b>     | <b>4</b>     | <b>5</b>     |



76 **Table S4** Percent distribution of bacterial families measured in water and biofilm samples gathered from the Pond Inlet drinking water  
77 system in May 2018

| Family                      | PH    | TR    | B1_B  | B2_B  | B3_B  | B5_B  | B1_W  | B2_W | B3_W  | B4_W  | B6_W  |
|-----------------------------|-------|-------|-------|-------|-------|-------|-------|------|-------|-------|-------|
| <i>Bacterium</i>            | 3.4%  | --    | --    | --    | --    | --    | --    | --   | --    | --    | --    |
| <i>Acetobacteraceae</i>     | --    | --    | --    | --    | --    | --    | --    | --   | 3.1%  | --    | --    |
| <i>Burkholderiaceae</i>     | 9.3%  | 6.1%  | 13.8% | --    | 23.5% | 9.8%  | 5.7%  | 3.1% | 8.1%  | 18.9% | 4.4%  |
| <i>Caulobacteraceae</i>     | --    | --    | --    | --    | --    | --    | --    | --   | 5.7%  | --    | --    |
| <i>Chitinophagaceae</i>     | 7.7%  | 6.3%  | --    | --    | 8.9%  | 2.9%  | --    | --   | --    | 3.8%  | 5.3%  |
| <i>Clade III</i>            | 3.5%  | --    | --    | --    | --    | --    | --    | --   | --    | --    | --    |
| <i>Dongiaceae</i>           | --    | --    | --    | --    | --    | --    | --    | --   | 4.0%  | --    | --    |
| <i>Env.OPS 17</i>           | 3.4%  | 4.0%  | --    | --    | --    | 12.7% | --    | 3.0% | --    | 3.0%  | --    |
| <i>Epipxis sp. PR26KG</i>   | --    | --    | --    | --    | --    | 3.6%  | --    | --   | --    | --    | --    |
| <i>Flavobacteriaceae</i>    | --    | --    | --    | --    | --    | 5.5%  | --    | --   | --    | --    | --    |
| <i>Gemmataceae</i>          | --    | 3.5%  | --    | --    | 2.3%  | --    | --    | 3.7% | --    | --    | --    |
| <i>Hyphomicrobiaceae</i>    | --    | --    | 6.4%  | --    | --    | --    | --    | --   | --    | --    | --    |
| <i>Illumatobacteraceae</i>  | 2.9%  | 3.8%  | --    | --    | --    | --    | --    | --   | --    | --    | --    |
| <i>Methylomonaceae</i>      | 8.3%  | 10.3% | --    | --    | --    | 9.6%  | --    | 4.9% | --    | 7.2%  | --    |
| <i>Methylophilaceae</i>     | 10.9% | 9.1%  | --    | --    | --    | --    | --    | --   | --    | --    | --    |
| <i>Microscillaceae</i>      | --    | --    | --    | --    | 5.1%  | --    | --    | --   | --    | --    | --    |
| <i>Moraxellaceae</i>        | --    | --    | --    | 93.5% | --    | --    | --    | --   | --    | --    | --    |
| <i>Mycobacteriaceae</i>     | --    | --    | 5.8%  | --    | --    | --    | --    | 6.8% | --    | --    | --    |
| <i>Nitrosomondaceae</i>     | --    | 2.5%  | --    | --    | --    | --    | --    | --   | --    | --    | --    |
| <i>Nitrospiraceae</i>       | --    | --    | 13.7% | --    | --    | --    | --    | --   | --    | --    | --    |
| <i>NS11-12 marine group</i> | --    | --    | --    | --    | --    | --    | --    | --   | 2.7%  | --    | --    |
| <i>Phycisphaeraceae</i>     | --    | --    | 4.9%  | --    | --    | --    | --    | --   | --    | --    | --    |
| <i>Pirellulaceae</i>        | --    | 4.0%  | 10.3% | --    | --    | 5.0%  | --    | 7.7% | 5.2%  | 4.5%  | --    |
| <i>Propionibacteriaceae</i> | --    | --    | --    | 6.5%  | --    | --    | --    | --   | --    | --    | --    |
| <i>Pseudomonadaceae</i>     | --    | --    | --    | --    | --    | --    | --    | --   | --    | 3.8%  | --    |
| <i>Reyranellaceae</i>       | --    | --    | --    | --    | --    | --    | --    | --   | 3.8%  | --    | 3.1%  |
| <i>Schlesneriaceae</i>      | --    | --    | --    | --    | --    | --    | --    | --   | --    | --    | 24.8% |
| <i>Solibacteracea</i>       | --    | --    | --    | --    | --    | --    | --    | --   | --    | --    | 8.6%  |
| <i>Solirubacteraceae</i>    | --    | --    | --    | --    | --    | --    | --    | 3.8% | --    | 2.6%  | --    |
| <i>Sphingomonadaceae</i>    | --    | --    | 18.7% | --    | 48%   | 7.1%  | 64.5% | 38%  | 29.3% | 7.8%  | 30.1% |
| <i>Sporichthyaceae</i>      | 15.7% | 17.6% | --    | --    | --    | 15.8% | --    | 2.5% | --    | 9.9%  | --    |

| <b>Family</b>                  | <b>PH</b>    | <b>TR</b>    | <b>B1_B</b>  | <b>B2_B</b> | <b>B3_B</b>  | <b>B5_B</b>  | <b>B1_W</b>  | <b>B2_W</b>  | <b>B3_W</b>  | <b>B4_W</b>  | <b>B6_W</b>  |
|--------------------------------|--------------|--------------|--------------|-------------|--------------|--------------|--------------|--------------|--------------|--------------|--------------|
| Unknown Family                 | --           | --           | --           | --          | --           | 7.4%         | --           | --           | --           | --           | --           |
| <i>Xanthobacteraceae</i>       | --           | --           | 6.9%         | --          | --           | --           | --           | --           | 5.3%         | --           | 5.6%         |
| <b>Total &gt; 2.5%</b>         | <b>65.1%</b> | <b>67.2%</b> | <b>80.5%</b> | <b>100%</b> | <b>87.8%</b> | <b>79.4%</b> | <b>70.2%</b> | <b>73.5%</b> | <b>67.2%</b> | <b>61.7%</b> | <b>81.9%</b> |
| <b>&lt; 2.5%</b>               | <b>34.9%</b> | <b>32.8%</b> | <b>19.5%</b> | <b>0%</b>   | <b>12.2%</b> | <b>20.6%</b> | <b>29.8%</b> | <b>26.5%</b> | <b>32.8%</b> | <b>38.3%</b> | <b>18.1%</b> |
| <b>Total</b>                   | <b>100%</b>  | <b>100%</b>  | <b>100%</b>  | <b>100%</b> | <b>100%</b>  | <b>100%</b>  | <b>100%</b>  | <b>100%</b>  | <b>100%</b>  | <b>100%</b>  | <b>100%</b>  |
| <b># of Families &gt; 2.5%</b> | <b>9?</b>    | <b>10</b>    | <b>8</b>     | <b>2</b>    | <b>5</b>     | <b>11?</b>   | <b>2</b>     | <b>9</b>     | <b>9</b>     | <b>9</b>     | <b>7</b>     |

78

79 **Table S5** Percent distribution of bacterial genera measured in water and biofilm samples gathered from the Pond Inlet drinking water  
80 system in May 2018

| Genus                                | PH    | TR    | B1 B  | B2 B  | B3 B  | B5 B  | B1 W  | B2 W | B3 W | B4 W | B6 W  |
|--------------------------------------|-------|-------|-------|-------|-------|-------|-------|------|------|------|-------|
| <i>Acinetobacter</i>                 | --    | --    | --    | 93.5% | --    | --    | --    | --   | --   | --   | --    |
| <i>Altererythrobacter</i>            | --    | --    | --    | --    | 41.7% | --    | --    | --   | --   | --   | --    |
| <i>Aquabacterium</i>                 | --    | --    | --    | --    | --    | --    | 4.4%  | --   | --   | --   | 4.4%  |
| <i>Bradyrhizobium</i>                | --    | --    | --    | --    | --    | --    | --    | --   | --   | --   | 2.6%  |
| <i>Candidatus<br/>Methylopumilus</i> | 5.2%  | 4.5%  | --    | --    | --    | --    | --    | --   | --   | 2.6% | --    |
| <i>Candidatus Ovatusbacter</i>       | --    | --    | --    | --    | --    | 4.3%  | --    | --   | --   | --   | --    |
| <i>CL500-29 marine group</i>         | 2.9%  | 3.8%  | --    | --    | --    | --    | --    | --   | --   | --   | --    |
| <i>Conexibacter</i>                  | --    | --    | --    | --    | --    | --    | --    | 3.8% | --   | 2.6% | --    |
| <i>Cutibacterium</i>                 | --    | --    | --    | 6.5%  | --    | --    | --    | --   | --   | --   | --    |
| <i>Dongia</i>                        | --    | --    | --    | --    | --    | --    | --    | --   | 4.0% | --   | --    |
| <i>Epipyxis sp. PR26KG</i>           | --    | --    | --    | --    | --    | 3.6%  | --    | --   | --   | --   | --    |
| <i>Flavisolibacter</i>               | --    | --    | --    | --    | --    | --    | --    | --   | --   | --   | 4.9%  |
| <i>Flavobacterium</i>                | --    | --    | --    | --    | --    | 5.5%  | --    | --   | --   | --   | --    |
| <i>hgcl clade</i>                    | 14.5% | 16.3% | --    | --    | --    | 15.3% | --    | --   | --   | 9.0% | --    |
| <i>Hyphomicrobium</i>                | --    | --    | 5.6%  | --    | --    | --    | --    | --   | --   | --   | --    |
| <i>Lacibacter</i>                    | --    | --    | --    | --    | 8.0%  | --    | --    | --   | --   | --   | --    |
| <i>Methylobacter</i>                 | 7.2%  | 9.3%  | --    | --    | --    | 9.6%  | --    | 4.3% | --   | 6.9% | --    |
| <i>Methylotenera</i>                 | 4.8%  | 3.9%  | --    | --    | --    | --    | --    | --   | --   | --   | --    |
| <i>Mycobacterium</i>                 | --    | --    | 5.8%  | --    | --    | --    | --    | 6.8% | --   | --   | --    |
| <i>Nitrospira</i>                    | --    | --    | 13.7% | --    | --    | --    | --    | --   | --   | --   | 3.1%  |
| <i>Novosphingobium</i>               | --    | --    | --    | --    | --    | --    | 38.8% | --   | 4.7% | --   | 3.8%  |
| <i>Paludibaculum</i>                 | --    | --    | --    | --    | --    | --    | --    | --   | --   | --   | 8.6%  |
| <i>Phenylobacterium</i>              | --    | --    | --    | --    | --    | --    | --    | --   | 5.2% | --   | --    |
| <i>Pirellula</i>                     | --    | --    | 3.2%  | --    | --    | --    | --    | --   | --   | --   | --    |
| <i>Planctopirus</i>                  | --    | --    | --    | --    | --    | --    | --    | --   | --   | --   | 24.8% |
| <i>Polaromonas</i>                   | --    | --    | --    | --    | 2.6%  | --    | --    | --   | --   | --   | --    |
| <i>Polymorphobacter</i>              | --    | --    | --    | --    | --    | --    | --    | --   | --   | --   | 11.3% |
| <i>Pseudomonas</i>                   | --    | --    | --    | --    | --    | --    | --    | --   | --   | 3.8% | --    |
| <i>Reyranella</i>                    | --    | --    | --    | --    | --    | --    | --    | --   | 3.8% | --   | 3.1%  |
| <i>Rhizobacter</i>                   | --    | --    | --    | --    | --    | --    | --    | --   | 4.0% | --   | --    |
| <i>Rhodoferax</i>                    | 3.6%  | --    | 4.0%  | --    | --    | --    | --    | --   | --   | --   | --    |

| <b>Genus</b>                      | <b>PH</b>    | <b>TR</b>    | <b>B1_B</b>  | <b>B2_B</b> | <b>B3_B</b>  | <b>B5_B</b>  | <b>B1_W</b>  | <b>B2_W</b>  | <b>B3_W</b>  | <b>B4_W</b>  | <b>B6_W</b>  |
|-----------------------------------|--------------|--------------|--------------|-------------|--------------|--------------|--------------|--------------|--------------|--------------|--------------|
| <i>Rhodopseudomonas</i>           | --           | --           | 5.7%         | --          | --           | --           | --           | --           | --           | --           | --           |
| <i>Rhodovarius</i>                | --           | --           | --           | --          | --           | --           | --           | --           | 3.0%         | --           | --           |
| <i>Sediminibacterium</i>          | 5.3%         | 3.7%         | --           | --          | --           | --           | --           | --           | --           | 2.6%         | --           |
| <i>SM1A02</i>                     | --           | --           | 5.0%         | --          | --           | --           | --           | --           | --           | --           | --           |
| <i>Sphingomonas</i>               | --           | --           | 16.6%        | --          | --           | 6.6%         | 25.4%        | 35.6%        | 23.0%        | 6.7%         | 12.6%        |
| <i>Undibacterium</i>              | --           | --           | --           | --          | --           | 4.7%         | --           | 2.8%         | --           | 12.0%        | --           |
| <b>Total &gt; 2.5%</b>            | <b>43.5%</b> | <b>41.5%</b> | <b>59.6%</b> | <b>100%</b> | <b>52.3%</b> | <b>49.6%</b> | <b>68.6%</b> | <b>53.3%</b> | <b>47.7%</b> | <b>46.2%</b> | <b>79.2%</b> |
| <b>&lt; 2.5%</b>                  | <b>56.5%</b> | <b>58.5%</b> | <b>40.4%</b> | <b>0%</b>   | <b>47.7%</b> | <b>50.4%</b> | <b>31.4%</b> | <b>46.7%</b> | <b>52.3%</b> | <b>53.8%</b> | <b>20.8%</b> |
| <b>Total</b>                      | <b>100%</b>  | <b>100%</b>  | <b>100%</b>  | <b>100%</b> | <b>100%</b>  | <b>100%</b>  | <b>100%</b>  | <b>100%</b>  | <b>100%</b>  | <b>100%</b>  | <b>100%</b>  |
| <b>Number of Genera &gt; 2.5%</b> | <b>7</b>     | <b>6</b>     | <b>8</b>     | <b>2</b>    | <b>3</b>     | <b>7</b>     | <b>3</b>     | <b>5</b>     | <b>7</b>     | <b>8</b>     | <b>10</b>    |

81

82

83 **Table S6** Relative abundances of eukaryotic organisms present in the Pond Inlet water and biofilm samples. Cumulatively, these  
84 organisms represent the majority (greater than or equal to 70%) of ASVs in each sample

|                         | <b>Pumphouse</b> | <b>Truck</b> | <b>B4 Water</b> | <b>B2 Biofilm</b> | <b>B5 Biofilm</b> |
|-------------------------|------------------|--------------|-----------------|-------------------|-------------------|
| <b>Genus</b>            |                  |              |                 |                   |                   |
| <i>Symbiodinium</i>     | n.d.             | n.d.         | n.d.            | 83.1%             | 28.6%             |
| <i>Cladophora</i>       | n.d.             | n.d.         | n.d.            | 1.8%              | 1.0%              |
| <i>Biecheleria</i>      | 22.9%            | 14.0%        | 11.4%           | n.d.              | 16.1%             |
| <i>Tetrahymena</i>      | n.d.             | n.d.         | <1%             | n.d.              | 5.0%              |
| <i>Coniochaeta</i>      | n.d.             | n.d.         | 2.9%            | n.d.              | n.d.              |
| <i>Rhizoclostratium</i> | n.d.             | n.d.         | 2.9%            | n.d.              | n.d.              |
| <b>Order</b>            |                  |              |                 |                   |                   |
| Syndiniales G1          | n.d.             | n.d.         | n.d.            | 2.9%              | <1%               |
| Cyclopoida              | 64.9%            | 67.1%        | 20.4%           | n.d.              | 16.7%             |
| Ploimida                | n.d.             | <1%          | n.d.            | n.d.              | 2.6%              |
| Cercomonas              | n.d.             | n.d.         | 32.7%           | n.d.              | n.d.              |
| <b>Class</b>            |                  |              |                 |                   |                   |
| Demospongiae            | n.d.             | n.d.         | <1%             | 4.5%              | 6.2%              |

85 n.d. = not detected

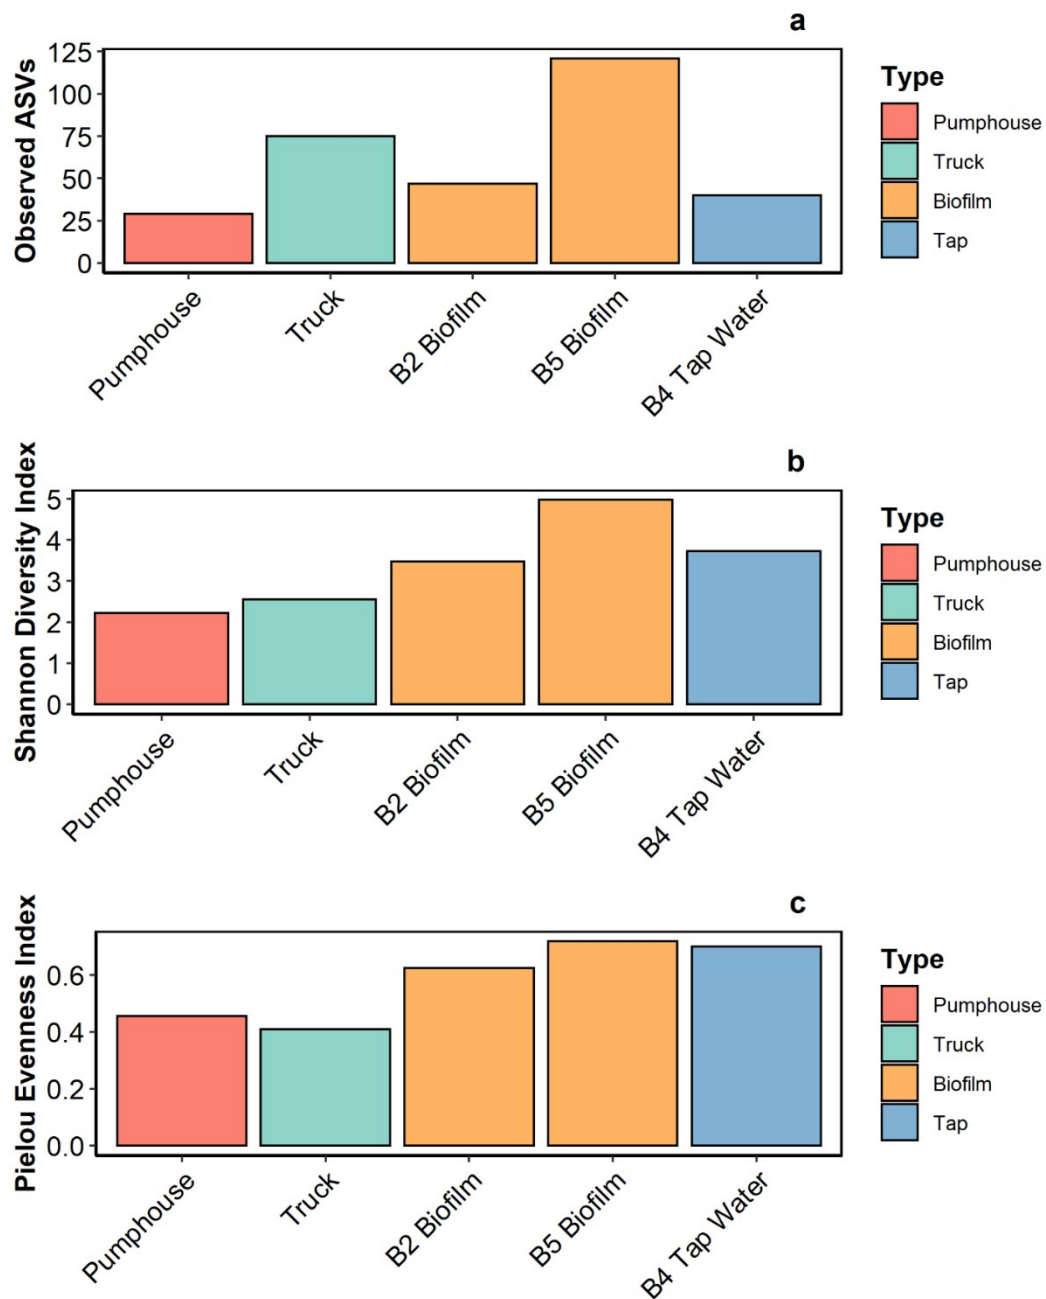

**Figure S4** Richness (a), Shannon Diversity Index (b), and Pielou Evenness Index (c) of eukaryotic organisms detected in five samples gathered from various points in the Pond Inlet drinking water system in May 2018.

## 91 **References**

- 92 1. Helsel DR, Hirsch RM. Statistical Methods in Water Resources. U.S. Geological Survey; 2002.  
93 (Techniques of Water-Resources Investigation of the United States Geological Survey).
- 94 2. Vaz-Moreira I, Nunes OC, Manaia CM. Diversity and Antibiotic Resistance Patterns of  
95 Sphingomonadaceae Isolates from Drinking Water. Applied and Environmental Microbiology. 2011  
96 Aug 15;77(16):5697–706.
